# Supplementary material for: Computational Investigations on Reaction Mechanisms of the Covalent Inhibitors Ponatinib and Analogs Targeting the Extracellular Signal-Regulated Kinases
Source: MDPI journal article supplement (doi:10.3390/ijms242015223), 2023-10-16
Supplement: s1 [file s1]

# **Supporting Information**

## **Computational Investigations on Reaction Mechanisms of the Covalent Inhibitors Ponatinib and Analogs Targeting the Extracellular Signal-regulated Kinases**

TIAN Yafeng, ZHANG Mi, HENG Panpan, HOU Hua, WANG Baoshan\*  
(College of Chemistry and Molecular Sciences, Wuhan University, Wuhan 430072, China)

\*Corresponding author. E-mail: [baoshan@whu.edu.cn](mailto:baoshan@whu.edu.cn)

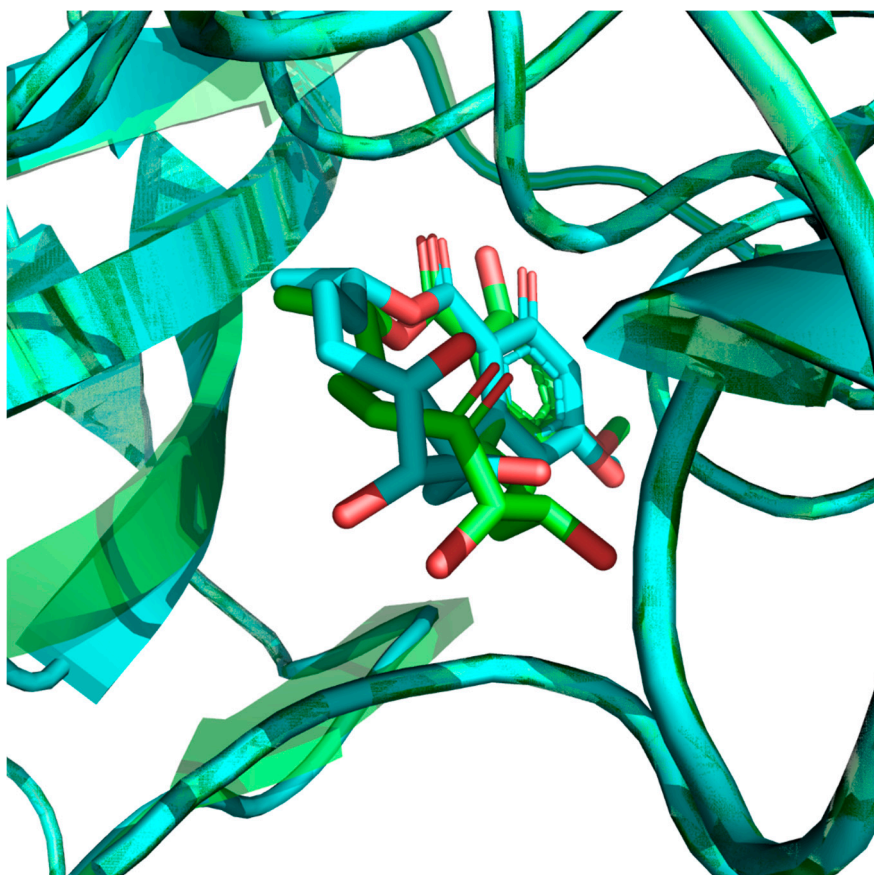

**Figure S1.** Re-docked co-crystal ligand/ERK2 in the binding pocket. Green sticks: Docked ligand. Cyan sticks: Experimental ligand.

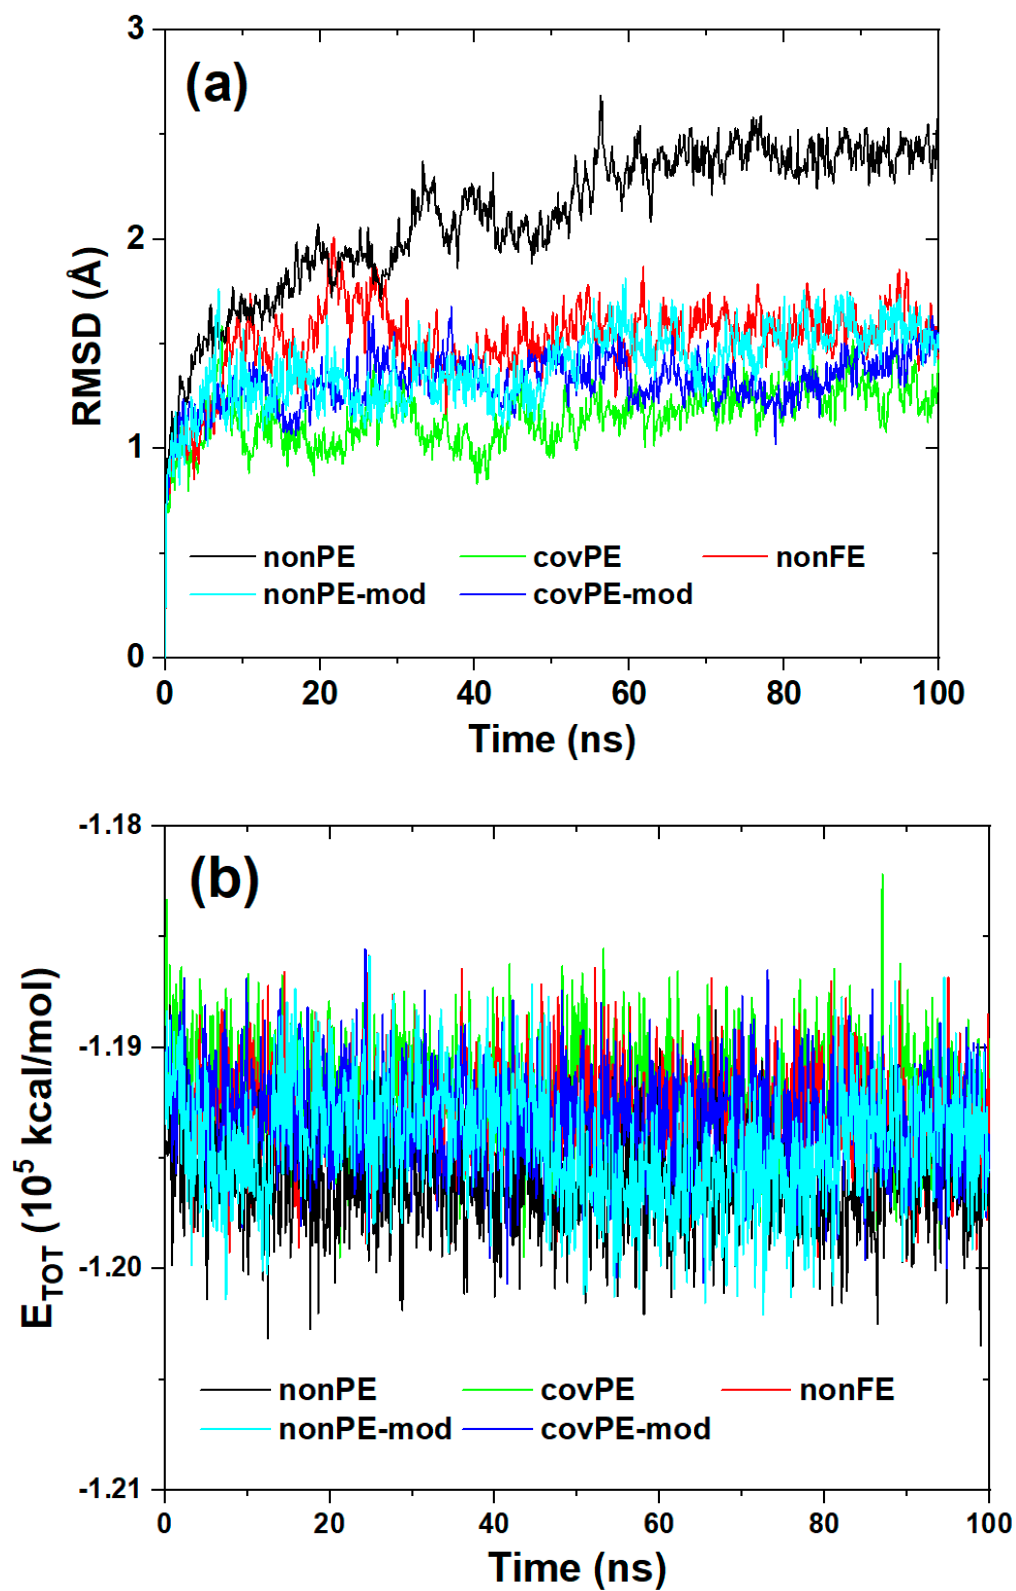

**Figure S2.** Temporal profiles for the RMSD of the backbone atoms of the protein (a) and the  $E_{TOT}$  (b) data for various inhibitor-ERK2 complexes.

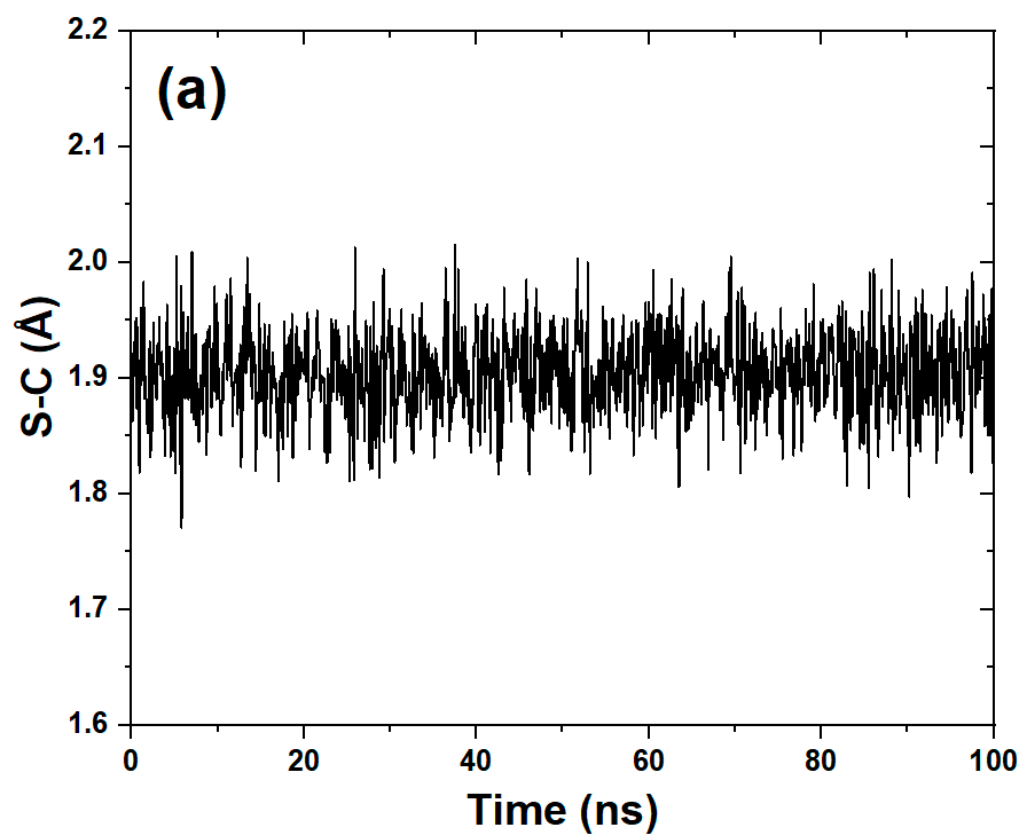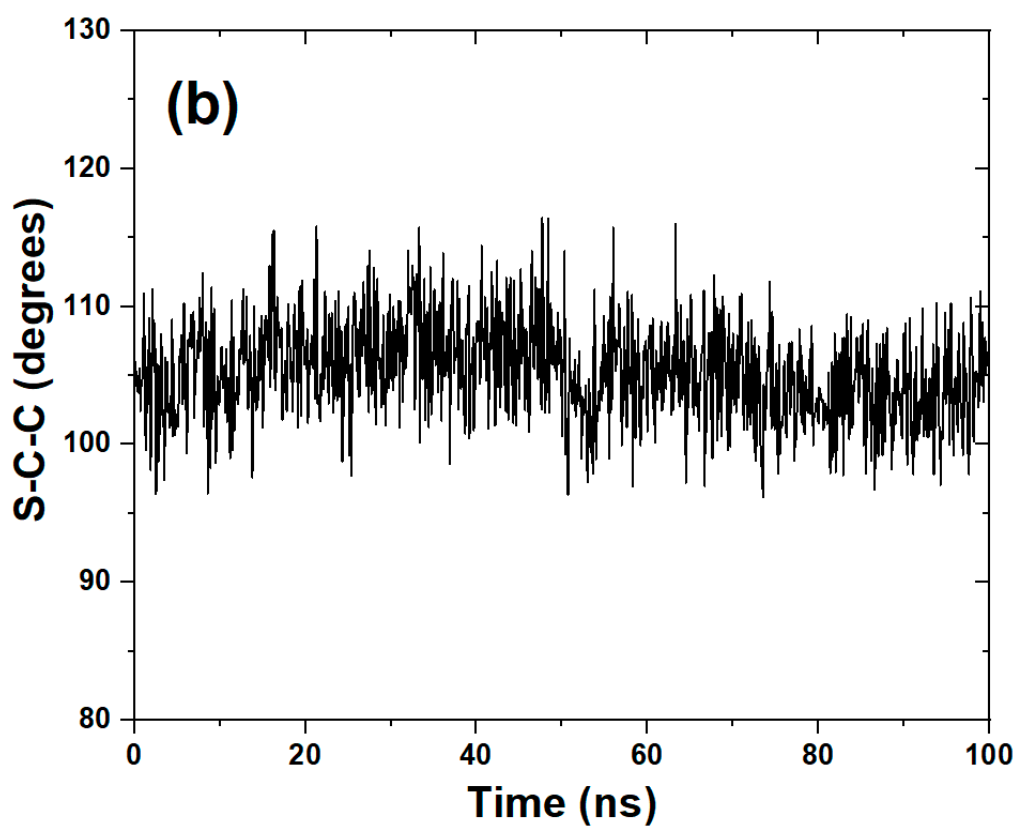

**Figure S3.** Temporal profiles for the characteristic geometrical parameters of the covalent bond between Ponatinib and the Cys166 residue: (a) S-C bond distances. (b) S-C-C bond angles.

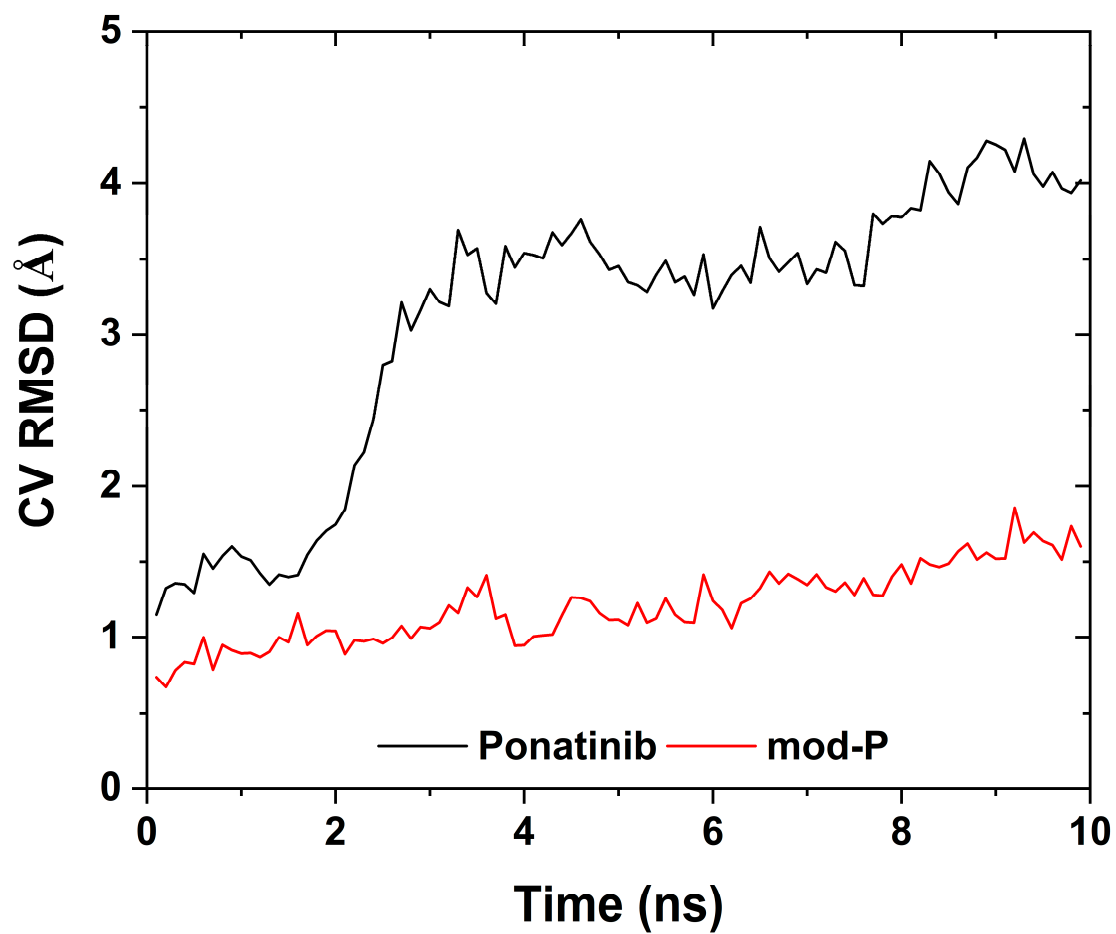

**Figure S4.** Average CV RMSD of Ponatinib and mod-P conformation over  $10 \times 10$  ns metadynamics runs.
